# Supplementary material for: High-throughput interaction screens illuminate the role of c-di-AMP in cyanobacterial nighttime survival
Source: PubMed Central journal article supplement (PMC5897029; doi:10.1371/journal.pgen.1007301), 2018-04-02

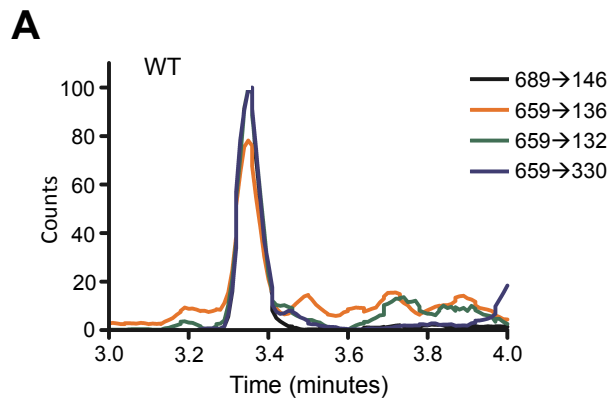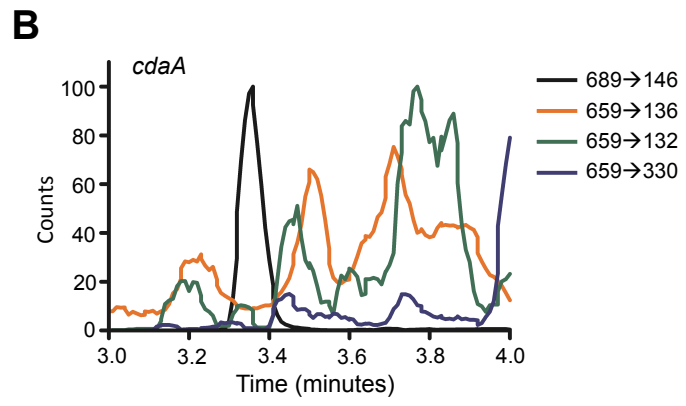

Supplement: pgen.1007301.s002.pdf [file pgen.1007301.s002.pdf]
